# Supplementary material
Source: PubMed Central journal article supplement (PMC2697296)
Supplement: tjp0587-2233-SD1.pdf [file tjp0587-2233-SD1.pdf]

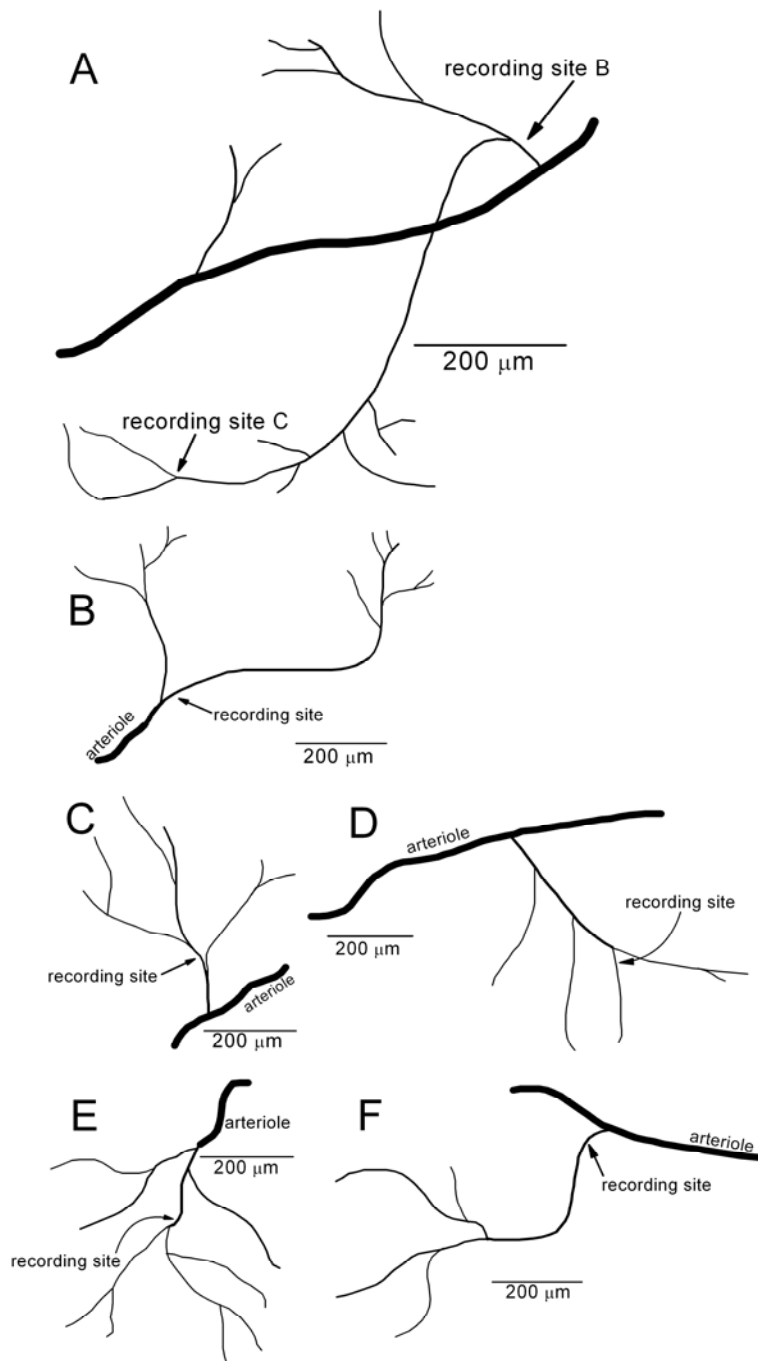

**Supplemental Figure 1.** Sketches of various microvascular complexes used in this study. **A**, the microvascular complex studied in Figure 3 B and C. **B**, the microvascular complex studied in Figure 5B. **C**, the microvascular complex studied in Figure 7A. **D**, the microvascular complex studied in Figure 7B. **E**, the microvascular complex studied in Figure 9B. **F**, the microvascular complex studied in Figure 9C.
